# Supplementary material
Source: Springer Nature journal article supplement (https://www.springermedizin.de/resource/supplementary/12889_2009_2281_MOESM5_ESM.pdf/9485238)

# Home based care visits - Bangwe

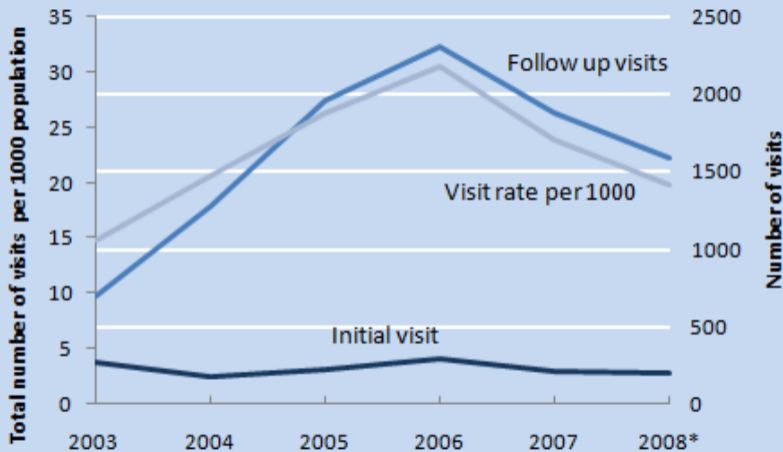

Source: Bangwe Home Based Care Project

Supplement: MOESM5 [file 9485238]
